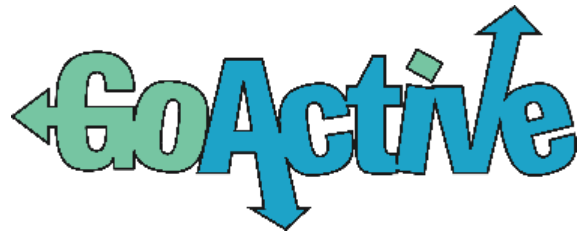

**Thank you for agreeing to participate in the GoActive evaluation study.**

In this booklet, we will be asking short questions about the physical activity opportunities in your school.

- ✓ Please complete all of the questions in this booklet.
- ✓ Please only select one answer per question or item (i.e. either tick *one* box, or circle *one* response).

**Please consider Year 9 in particular when answering this questionnaire.**

Your answers will be treated as confidential. If you have any questions, please do not hesitate to contact the study team: [goactive@mrc-epid.cam.ac.uk](mailto:goactive@mrc-epid.cam.ac.uk) or Freephone 0800 917 3319

# Section 1: School information

1. Name of school \_\_\_\_\_

2. What is your position?

|                          |                              |
|--------------------------|------------------------------|
| <input type="checkbox"/> | Head teacher                 |
| <input type="checkbox"/> | Deputy head teacher          |
| <input type="checkbox"/> | Physical Education lead      |
| <input type="checkbox"/> | Year 9 lead                  |
| <input type="checkbox"/> | Other (please specify) _____ |

3. What time does the normal school day start? \_\_\_\_\_ and finish? \_\_\_\_\_

4. At what time are breaks held, and how long do they last?

|                                 | Start time | Duration (minutes) |
|---------------------------------|------------|--------------------|
| a. Morning break                |            |                    |
| b. Lunchtime                    |            |                    |
| c. Afternoon break              |            |                    |
| d. Other (please specify) _____ |            |                    |

5. Have any events occurred during the measurement period that may have influenced the level of physical activity of Year 9 students (e.g. sports day)?

Your measurement period: \_\_\_\_\_ to \_\_\_\_\_

|                          |                                    |
|--------------------------|------------------------------------|
| <input type="checkbox"/> | No                                 |
| <input type="checkbox"/> | Yes ( <i>please give details</i> ) |

.....

.....

.....

.....

## Please now think about the area around your school.

6. Please indicate whether the following are present:

| None | Some | A lot |                                                        |
|------|------|-------|--------------------------------------------------------|
|      |      |       | a. Planted beds containing flowers/shrubs/small trees  |
|      |      |       | b. Trees for shade                                     |
|      |      |       | c. Loud ambient noise (e.g. traffic, trains, industry) |
|      |      |       | d. Litter                                              |
|      |      |       | e. Murals/outdoor art                                  |
|      |      |       | f. Graffiti                                            |

7. To what extent do you agree or disagree with the following statements?

|                                                                              | Strongly disagree        | Disagree                 | Neither disagree nor agree | Agree                    | Strongly agree           |
|------------------------------------------------------------------------------|--------------------------|--------------------------|----------------------------|--------------------------|--------------------------|
| a. The grounds are shielded from the surrounding area by hedges/trees/fences | <input type="checkbox"/> | <input type="checkbox"/> | <input type="checkbox"/>   | <input type="checkbox"/> | <input type="checkbox"/> |
| b. The grounds are generally well maintained                                 | <input type="checkbox"/> | <input type="checkbox"/> | <input type="checkbox"/>   | <input type="checkbox"/> | <input type="checkbox"/> |
| c. The grounds are generally free of vandalism                               | <input type="checkbox"/> | <input type="checkbox"/> | <input type="checkbox"/>   | <input type="checkbox"/> | <input type="checkbox"/> |

## Section 2: Pupil overview

Please answer the following questions in reference to Year 9 wherever possible.

If Year 9 information is not available, please complete school-level information.

- |                                                                                  |                |                      |
|----------------------------------------------------------------------------------|----------------|----------------------|
| 8. How many pupils are there in....?                                             | a. Year 9..... | b. Whole school..... |
| 9. How many boys are there in...?                                                | a. Year 9..... | b. Whole school..... |
| 10. How many girls are there in...?                                              | a. Year 9..... | b. Whole school..... |
| 11. What is the percentage of pupils for whom you receive Pupil Premium funding? | a. Year 9..... | b. Whole school..... |

## Section 3: Physical activity opportunities at school

### 12. Does your school have access to...

Please tick all that apply.

If yes, how would you rate their quality?

Please take into account the level of maintenance, cleanliness, accessibility etc.

|                                                                                    | No | Yes | → | High | Medium | Low |
|------------------------------------------------------------------------------------|----|-----|---|------|--------|-----|
| a. A specific indoor hall for gym or sports                                        |    |     | → |      |        |     |
| b. A shared indoor facility used for sports activities                             |    |     | → |      |        |     |
| c. A sports or football field/pitch on school grounds                              |    |     | → |      |        |     |
| d. Athletics track (grass or hard surface)                                         |    |     | → |      |        |     |
| e. Courts (e.g. tennis, basketball including half court, netball, multicourt area) |    |     | → |      |        |     |
| f. A recreational area on school grounds                                           |    |     | → |      |        |     |
| g. A wildlife garden                                                               |    |     | → |      |        |     |
| h. Bright or fluorescent markings on play surfaces (e.g. hopscotch, animals)       |    |     | → |      |        |     |
| i. Playground equipment (e.g. swings, slide)                                       |    |     | → |      |        |     |
| j. Benches                                                                         |    |     | → |      |        |     |
| k. Picnic tables                                                                   |    |     | → |      |        |     |
| l. Drinking fountains                                                              |    |     | → |      |        |     |
| m. Uncovered cycle parking                                                         |    |     | → |      |        |     |
| n. Covered cycle parking                                                           |    |     | → |      |        |     |
| o. An assault course                                                               |    |     | → |      |        |     |
| p. Formal garden/quiet space                                                       |    |     | → |      |        |     |
| q. Outdoor teaching space                                                          |    |     | → |      |        |     |
| r. Vegetable/fruit garden                                                          |    |     | → |      |        |     |
| s. Playing fields or a local park off school grounds, which you can use            |    |     | → |      |        |     |
| t. Purpose built changing facilities                                               |    |     | → |      |        |     |
| u. Sports equipment (e.g. gymnastics equipment)                                    |    |     | → |      |        |     |

13. Are the school grounds generally suitable for....?

| Very | Somewhat | Not at all |                                             |
|------|----------|------------|---------------------------------------------|
|      |          |            | a. Sport (organised or not)                 |
|      |          |            | b. Informal games (kickabout, Frisbee etc.) |
|      |          |            | c. General play                             |

14. How many hours of physical education do the pupils in Year 9 usually have per week?

*Please round to the nearest half hour.*

..... hours per week

15. Does your school or any other organisation provide any extracurricular physical activity or sports programmes available to Year 9?

*Please tick your response in each case.*

|                        | No | Yes |
|------------------------|----|-----|
| a. Before school       |    |     |
| b. During lunch breaks |    |     |
| c. After school        |    |     |
| d. At weekends         |    |     |

16. Which of the following physical activities or sports are available as extracurricular programmes?

Please tick any that apply.

- a. Rounders
- b. Cricket
- c. Table tennis
- d. Gymnastics
- e. Boxing
- f. Volleyball
- g. Swimming
- h. Archery
- i. Martial Arts

Please specify

.....

- j. Dodgeball
- k. Fencing
- l. Handball
- m. Ultimate Frisbee
- n. Yoga
- o. Zumba
- p. Pilates
- q. Badminton
- r. Dance

Please specify

.....

- s. Tennis
- t. Hockey
- u. Football
- v. Netball
- w. Rugby
- x. Athletics

- y. Other

Please specify

.....

## Section 4: School rules and attitudes

Please tick the box that best indicates your agreement or disagreement with each of the following statements.

### 17. My school considers it important to...

|                                                                                            | Strongly disagree        | Disagree                 | Neither agree nor disagree | Agree                    | Strongly agree           |
|--------------------------------------------------------------------------------------------|--------------------------|--------------------------|----------------------------|--------------------------|--------------------------|
| a...encourage pupils to be physically active at school (for example, during school breaks) | <input type="checkbox"/> | <input type="checkbox"/> | <input type="checkbox"/>   | <input type="checkbox"/> | <input type="checkbox"/> |
| b...encourage pupils to do physical activity outside of school                             | <input type="checkbox"/> | <input type="checkbox"/> | <input type="checkbox"/>   | <input type="checkbox"/> | <input type="checkbox"/> |
| c...educate pupils about the risks of physical inactivity                                  | <input type="checkbox"/> | <input type="checkbox"/> | <input type="checkbox"/>   | <input type="checkbox"/> | <input type="checkbox"/> |
| d...provide information on how to be physically active in a safe manner                    | <input type="checkbox"/> | <input type="checkbox"/> | <input type="checkbox"/>   | <input type="checkbox"/> | <input type="checkbox"/> |
| e...encourage pupils to use active transport to school (e.g. walking, cycling)             | <input type="checkbox"/> | <input type="checkbox"/> | <input type="checkbox"/>   | <input type="checkbox"/> | <input type="checkbox"/> |

### 18. Which of the following statements best describes your rules relating to where Year 9 pupils can go during breaks (including lunchtime)?

Please tick one box only.

|                          |                                                                                                                                                    |
|--------------------------|----------------------------------------------------------------------------------------------------------------------------------------------------|
| <input type="checkbox"/> | It is compulsory for all Year 9 pupils to go outside, irrespective of the weather.                                                                 |
| <input type="checkbox"/> | When the weather allows, it is compulsory for all Year 9 pupils to go outside. However, all Year 9 pupils are kept inside in bad weather.          |
| <input type="checkbox"/> | When the weather allows, it is compulsory for all Year 9 pupils to go outside. However, if the weather is bad, they are allowed inside or outside. |
| <input type="checkbox"/> | The Year 9 pupils are allowed to go both inside and outside, irrespective of the weather.                                                          |
| <input type="checkbox"/> | It is compulsory for all Year 9 pupils to stay inside, irrespective of the weather.                                                                |

19. Are the Year 9 pupils allowed to do the following during breaks?

Please tick only one box per statement.

|                                      | Yes, always              | Yes, in bad weather      | No, never                |
|--------------------------------------|--------------------------|--------------------------|--------------------------|
| a. Use a computer                    | <input type="checkbox"/> | <input type="checkbox"/> | <input type="checkbox"/> |
| b. Watch TV or videos                | <input type="checkbox"/> | <input type="checkbox"/> | <input type="checkbox"/> |
| c. Use the school's sports equipment | <input type="checkbox"/> | <input type="checkbox"/> | <input type="checkbox"/> |
| d. Play ball games indoors           | <input type="checkbox"/> | <input type="checkbox"/> | <input type="checkbox"/> |
| e. Play ball games outdoors          | <input type="checkbox"/> | <input type="checkbox"/> | <input type="checkbox"/> |

20. Does your school have a policy to promote physical activity among Year 9 pupils?

Please tick only one box.

|                          |                         |
|--------------------------|-------------------------|
| <input type="checkbox"/> | Yes, a written policy   |
| <input type="checkbox"/> | Yes, an informal policy |
| <input type="checkbox"/> | No                      |

**Thank you very much for completing this questionnaire – we really appreciate your time!**
